# Supplementary material for: Understanding the Adsorption of Peptides and Proteins onto PEGylated Gold Nanoparticles
Source: MDPI journal article supplement (doi:10.3390/molecules26195788), 2021-09-24
Supplement: s1 [file s1]

## Supporting Information for:

### Understanding the Adsorption of Peptides and Proteins onto PEGylated Gold Nanoparticles

Y. Randika Perera,<sup>1,†</sup> Joanna Xiuzhu Xu,<sup>1,†</sup> Dhanush L. Amarasekara,<sup>1</sup> Alex C. Hughes,<sup>1</sup>  
Ibraheem Abboud,<sup>2</sup> and Nicholas C. Fitzkee<sup>1,\*</sup>

<sup>1</sup>Department of Chemistry, Mississippi State University, Mississippi State, Mississippi 39762,  
United States

<sup>2</sup>Department of Chemistry, University of Arkansas at Little Rock, Little Rock, Arkansas 72204,  
United States

<sup>†</sup> These authors contributed equally to this work.

\* To whom correspondence should be addressed:

Email: [nfitzkee@chemistry.msstate.edu](mailto:nfitzkee@chemistry.msstate.edu)

ORCID: 0000-0002-8993-2140

Phone: (662) 325-1288

Fax: (662) 325-1618

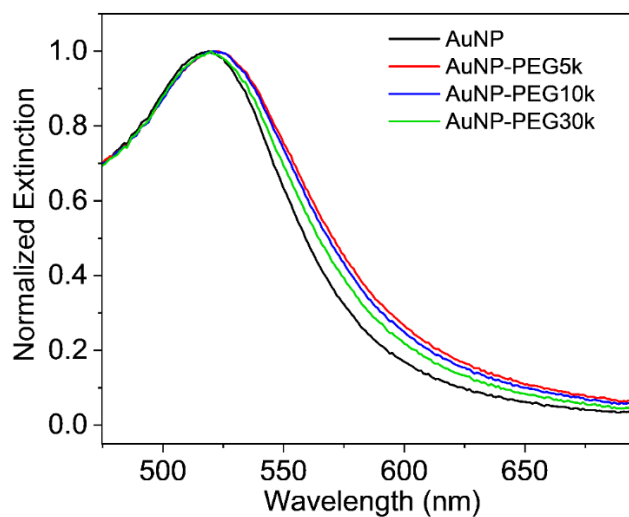

**Figure S1.** UV-vis spectra of (black) bare AuNP, (red) 5K-PEG-SH coated AuNP, (blue) 10K-PEG-SH coated AuNP, (green) 30K-PEG-SH coated AuNP. All spectra are normalized with the maximum extinction to be 1.

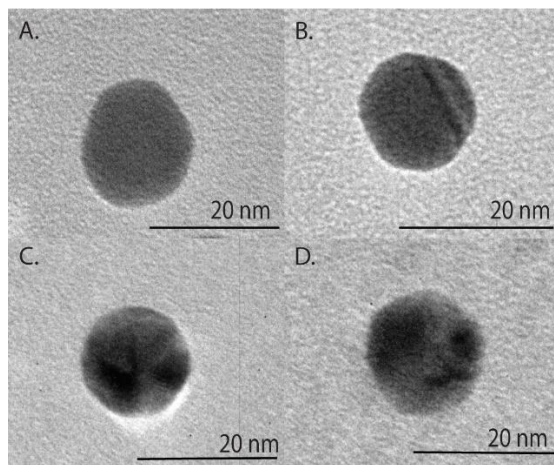

**Figure S2.** Transmission electron microscopy (TEM) characterization of PEG-grafted gold nanoparticles. Representative TEM images of (A) AuNP-PEG-5K, (B) AuNP-PEG-10K, (C) AuNP-PEG-30K and (D) bare 15 nm-AuNP.

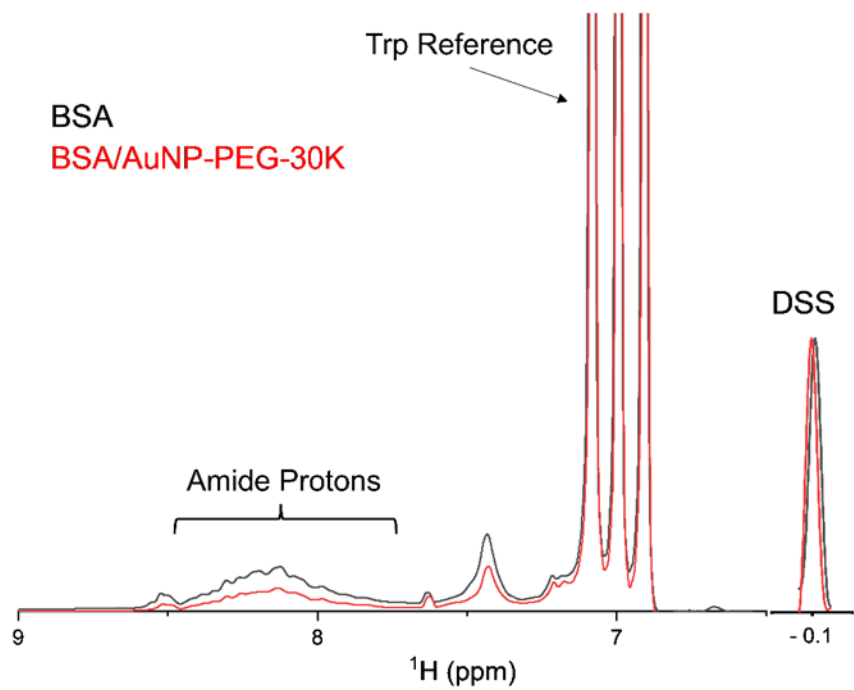

**Figure S3.** Example of quantifying protein unbound concentrations using 1D NMR for BSA. The black and red spectra are 20  $\mu\text{M}$  BSA control sample and 20  $\mu\text{M}$  BSA mixed with 120 nM AuNP-PEG-30K, respectively. Protein signals are reduced due to NP binding. TopSpin software is used to scale the amide proton region to calculate the amount of signal lost as a function of time.

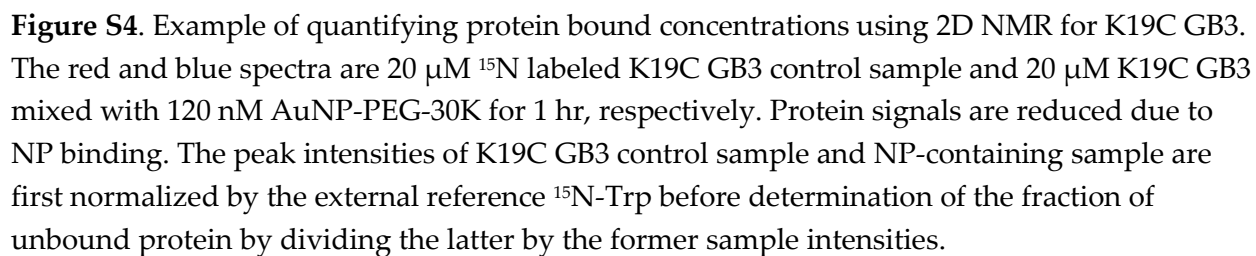

**Table S1.** Summary of bound concentration ([bound]) of ligand when mixing 20  $\mu\text{M}$  ligand with 120 nM 15-nm AuNPs and observed rate constants ( $k_{obs}$ ) of 20  $\mu\text{M}$  different ligands onto 120 nM PEGylated AuNPs used in this work

|                  | AuNP-PEG-5K               |                                                  | AuNP-PEG-10K              |                                                  | AuNP-PEG-30K              |                                                  |
|------------------|---------------------------|--------------------------------------------------|---------------------------|--------------------------------------------------|---------------------------|--------------------------------------------------|
|                  | [bound] ( $\mu\text{M}$ ) | $k_{obs} \times 10^{-5} \text{ (s}^{-1}\text{)}$ | [bound] ( $\mu\text{M}$ ) | $k_{obs} \times 10^{-5} \text{ (s}^{-1}\text{)}$ | [bound] ( $\mu\text{M}$ ) | $k_{obs} \times 10^{-5} \text{ (s}^{-1}\text{)}$ |
| <b>H1.5</b>      | $6.8 \pm 0.5$             | $1.3 \pm 0.2$                                    | $9.7 \pm 0.2$             | $3.0 \pm 0.5$                                    | $12.8 \pm 0.3$            | $4.3 \pm 0.2$                                    |
| <b>H1.5-Cys*</b> | $17.7 \pm 0.2$            | $460 \pm 80$                                     | $18.4 \pm 0.2$            | $690 \pm 120$                                    | $18.0 \pm 0.2$            | $1390 \pm 70$                                    |
| <b>GSH</b>       | $9.6 \pm 0.4$             | $2.9 \pm 0.1$                                    | $11.7 \pm 0.1$            | $4.0 \pm 0.2$                                    | $14.8 \pm 0.2$            | $6.1 \pm 0.2$                                    |
| <b>wt GB3</b>    | $0.4 \pm 0.5$             | N/A                                              | $2.4 \pm 0.4$             | $1.0 \pm 0.5$                                    | $4.9 \pm 0.5$             | $1.9 \pm 0.8$                                    |
| <b>K19C GB3</b>  | $2.0 \pm 0.5$             | $5.4 \pm 0.5$                                    | $4.7 \pm 0.4$             | $9.0 \pm 1.4$                                    | $7.0 \pm 0.4$             | $44 \pm 7$                                       |
| <b>BSA</b>       | $2.0 \pm 0.4$             | $7.6 \pm 1.8$                                    | $2.2 \pm 0.4$             | $15.0 \pm 1.9$                                   | $3.2 \pm 0.2$             | $14 \pm 2$                                       |

\* The fastest rate observable in our experiments is approximately  $900 \text{ s}^{-1}$  based on a 15-minute dead time. The rates for H1.5-Cys are therefore approximate.

**Table S2.** Comparison of AuNP-PEG concentrations determined by atomic absorption spectroscopy (AAS) and concentrations determined using the extinction coefficient at 520 nm ( $3.9 \times 10^8 \text{ M}^{-1} \text{ cm}^{-1}$ ), as described in the text.

|                     | [AuNP] by AAS (nM) | [AuNP] by UV-vis (nM) | Difference (%) |
|---------------------|--------------------|-----------------------|----------------|
| <b>AuNP</b>         | 1.638              | 1.60                  | 2.5            |
| <b>AuNP-PEG-5K</b>  | 1.638              | 1.69                  | -3.2           |
| <b>AuNP-PEG-10K</b> | 1.637              | 1.73                  | -5.8           |
| <b>AuNP-PEG-30K</b> | 1.637              | 1.67                  | -1.8           |
